# Supplementary material
Source: PubMed Central journal article supplement (PMC4755931)
Supplement: NIHMS756347-supplement-Table.pdf [file NIHMS756347-supplement-Table.pdf]

**Supplementary table** Sample of psychopathological manifestations in a cohort of patients with bvFTD due to pathogenic expansions in the C9ORF72 gene. (49)

| Age at onset | Sex | Psychopathological manifestations                                                                                                                                                                                                                                                           | Years before patient was referred to specialist dementia clinic |
|--------------|-----|---------------------------------------------------------------------------------------------------------------------------------------------------------------------------------------------------------------------------------------------------------------------------------------------|-----------------------------------------------------------------|
| 57           | M   | Complained of pieces of plastic emanating from his head, and threatened to cut offending plastic with a pocket knife.                                                                                                                                                                       | <1                                                              |
| 68           | F   | Reported visions of the devil, and developed behavioral strategies to keep the devil away. She also complained of diffuse body pain, but did not demonstrate signs of discomfort; She spent all day in bed to allow her “nerves to heal”. Her affect was described as “belle indifference”. | 4                                                               |
| 49           | M   | Developed persecutory delusions; he carried a knife and pistol for protection, and phoned the police every night at the same time to demand protection.                                                                                                                                     | 6                                                               |
| 55           | M   | Presented to local emergency department with delusional bowel incontinence, leading him to maintain his finger in his anus to prevent incontinence.                                                                                                                                         | 1                                                               |
| 64           | M   | Reported being under “surveillance”, and claimed to hear the voice of God.                                                                                                                                                                                                                  | 1                                                               |
| 65           | M   | Developed delusional parasitosis involving mites, which crawled under his skin and into his extremities. He believed the mites accumulated in his ear lobes and that he could kill them by pinching his ear lobe every 10 minutes.                                                          | 2                                                               |
| 62           | M   | Became concerned that his son was trying to kill him, hence he barricaded himself inside his home.                                                                                                                                                                                          | 10                                                              |
| 56           | M   | Developed paranoia directed at strangers and people he saw on television, who he thought were calling him names.                                                                                                                                                                            | 4                                                               |
| 53           | F   | Phoned the police because men were hiding in her garden, including one dressed as a gorilla. She reported seeing disembodied faces, which she thought were spirits. She also drank excessive amounts of water (leading to hyponatremia) in an effort to cure herself from leg pain.         | <1                                                              |
